# Supplementary material for: Hypomethylation of HOXA4 promoter is common in Silver-Russell syndrome and growth restriction and associates with stature in healthy children
Source: PubMed Central journal article supplement (PMC5691194; doi:10.1038/s41598-017-16070-5), 2017-11-16
Supplement: 41598_2017_16070_MOESM1_ESM.pdf [file 41598_2017_16070_MOESM1_ESM.pdf]

Supplementary information for:

**Hypomethylation of *HOXA4* promoter is common in Silver-Russell syndrome and growth restriction and associates with stature in healthy children**

Mari Muurinen (1), Katariina Hannula-Jouppi (1, 2), Lovisa E. Reinius (3), Cilla Söderhäll (3, 4), Simon Kebede Merid (5), Anna Bergström (5, 7), Erik Melén (5, 6, 7), Göran Pershagen (5, 7), Marita Lipsanen-Nyman (8), Dario Greco (9,10), Juha Kere (1, 3, 11, \*)

1 Folkhälsan Institute of Genetics, Helsinki, and Research Programs Unit, Molecular Neurology, University of Helsinki, Helsinki, Finland

2 Department of Dermatology, Skin and Allergy Hospital, University of Helsinki and Helsinki University Hospital, Helsinki, Finland

3 Department of Biosciences and Nutrition, Karolinska Institutet, Huddinge, Sweden

4 Department of Women's and Children's Health, Karolinska Institutet, Stockholm, Sweden

5 Institute of Environmental Medicine, Karolinska Institutet, Stockholm, Sweden

6 Sachs' Children's Hospital, Södersjukhuset, Stockholm, Sweden

7 Centre for Occupational and Environmental Medicine, Stockholm County Council, Stockholm, Sweden

8 Children's Hospital, University of Helsinki and Helsinki University Hospital, Helsinki, Finland

9 Institute of Biotechnology, University of Helsinki, Helsinki, Finland

10 Faculty of Medicine and Life Sciences & Institute of Biosciences and Medical Technology, University of Tampere, Finland

11 Department of Medical and Molecular Genetics, King's College London, Guy's Hospital, London, UK

\*Corresponding author: juha.kere@ki.se

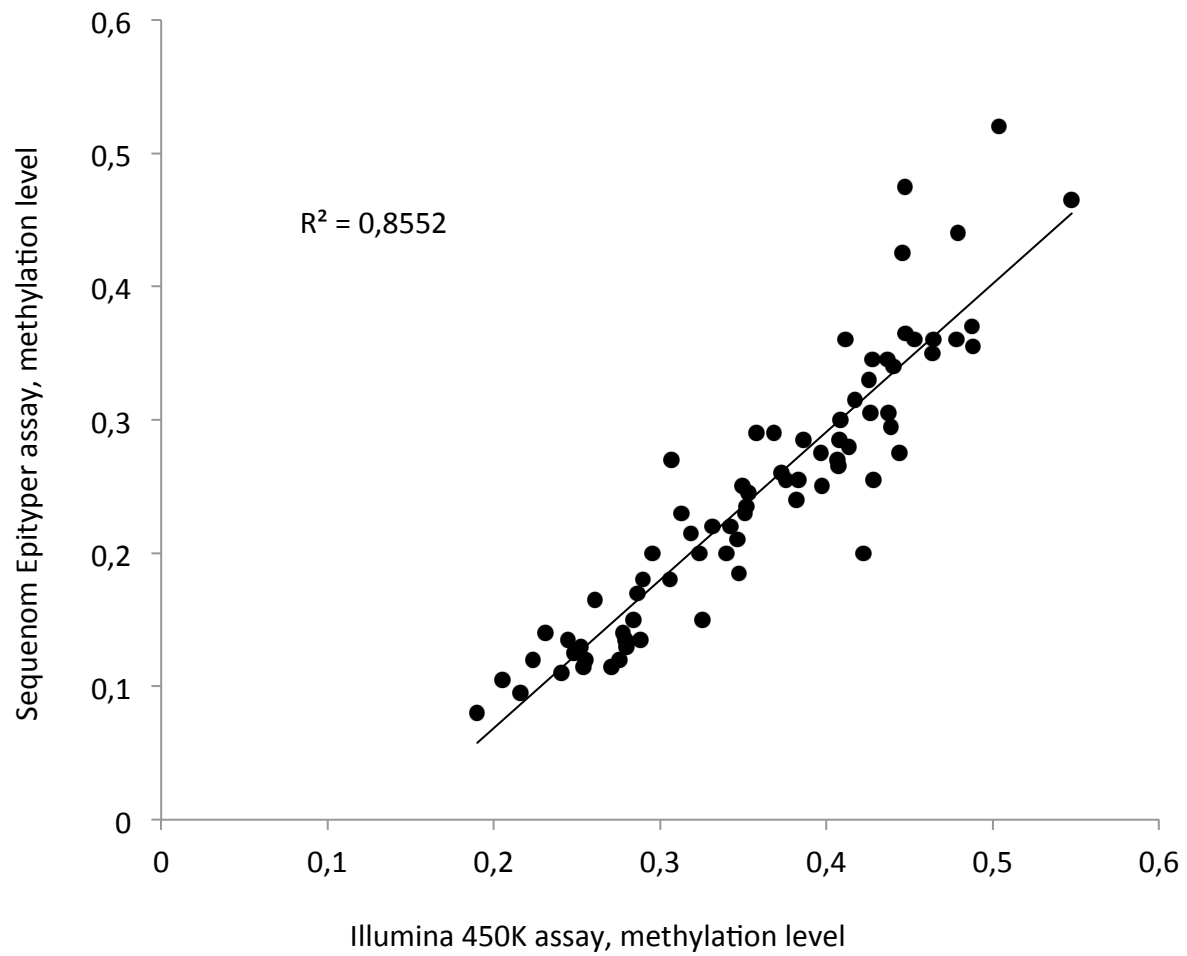

Supplementary figure 1. Correlation of methylation level measured by Epityper assay and Illumina 450K assay for the CpG at chr7:27170313 (cg04317399)

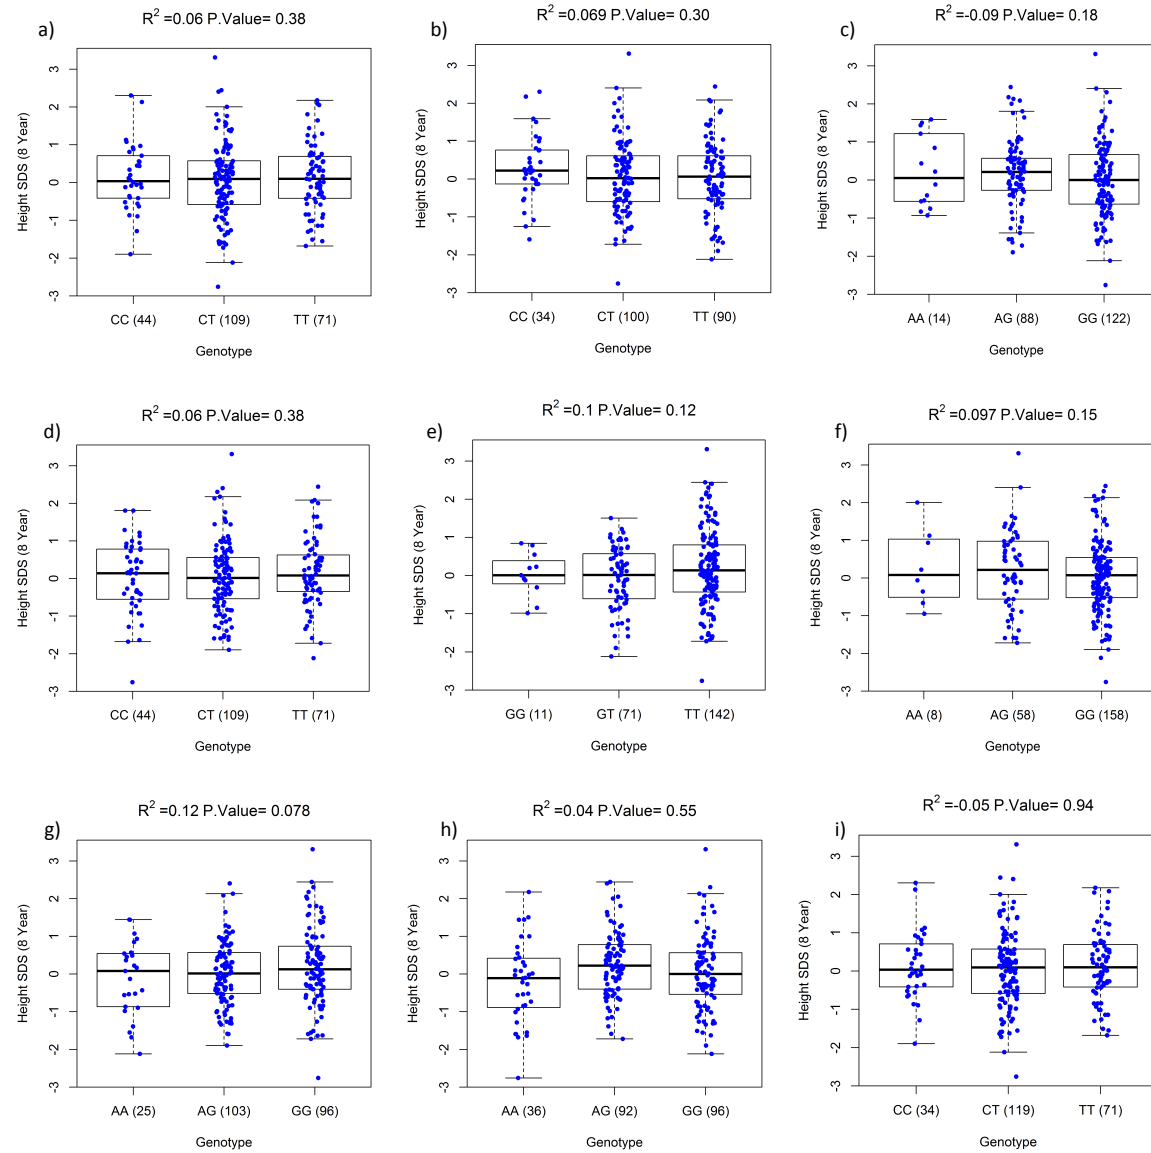

Supplementary figure 2. Association of height and genotype of height-associated SNPs in healthy controls of the Bamse cohort. Height has been measured approximately at the age of eight and measurements converted into SD scale. SNPs: a) rs1042725, b) rs2282978, c) rs2562784, d) rs8007661, e) rs11107116, f) rs2814993, g) rs10946808, h) rs6854783, i) rs6060369.

Supplementary table 1. Output list of all CpGs that passed the filtering process of 450K BeadChip assay. Median methylation values for controls (n=16), UPD(7)mat (n=10), clinical SRS (n=13) and 11p15 LOM (n=21) are represented. Methylation value for the single UPD(7)pat sample is also included. Difference in median methylation level ( $\Delta\beta^*100$ ) between each group and the controls is highlighted in green when the difference <2% (absolute methylation percentage), and in red when the difference >5% (absolute methylation percentage). Horizontal dashed line represents the breakpoint where *HOXA4* filtered CpGs were not consecutive.

| Gene            | locus    | Coordinates in hg19 | CpG ID     | controls       |                |                    | UPD(7)mat      |                    |                | clinical SRS       |                | 11p15 LOM          |         | UPD(7)pat |
|-----------------|----------|---------------------|------------|----------------|----------------|--------------------|----------------|--------------------|----------------|--------------------|----------------|--------------------|---------|-----------|
|                 |          |                     |            | median $\beta$ | median $\beta$ | $\Delta\beta^*100$ | median $\beta$ | $\Delta\beta^*100$ | median $\beta$ | $\Delta\beta^*100$ | median $\beta$ | $\Delta\beta^*100$ | $\beta$ |           |
| AGL             | 1p21.2   | 100315729           | cg08457409 | 0,02700422     | 0,03106522     | 0,406099547        | 0,02927068     | 0,226646053        | 0,03146936     | 0,446514449        | 0,0487343      |                    |         |           |
| AGL             | 1p21.2   | 100315927           | cg04143346 | 0,03271391     | 0,03761182     | 0,489791077        | 0,03648421     | 0,377030014        | 0,03597946     | 0,326554695        | 0,04303187     |                    |         |           |
| AGL             | 1p21.2   | 100315971           | cg17474694 | 0,017791       | 0,02593256     | 0,814156174        | 0,02296944     | 0,517844126        | 0,02302037     | 0,522937028        | 0,02714439     |                    |         |           |
| FAM98A          | 2p22.3   | 33824395            | cg06227257 | 0,01771466     | 0,02885952     | 1,11448577         | 0,02455451     | 0,683984366        | 0,02539969     | 0,768503054        | 0,02475127     |                    |         |           |
| FAM98A          | 2p22.3   | 33824427            | cg16512069 | 0,05212739     | 0,05622932     | 0,41019351         | 0,05514752     | 0,302013996        | 0,05531415     | 0,318676188        | 0,04959107     |                    |         |           |
| FAM98A          | 2p22.3   | 33824431            | cg18977641 | 0,03873951     | 0,04578876     | 0,704924705        | 0,04303603     | 0,429651646        | 0,04284431     | 0,410479347        | 0,04908338     |                    |         |           |
| EXOC6B          | 2p13.2   | 72946664            | cg23684316 | 0,59330972     | 0,55750627     | -3,58034453        | 0,58288525     | -1,04244679        | 0,56960811     | -2,37016049        | 0,55992722     |                    |         |           |
| EXOC6B          | 2p13.2   | 72977657            | cg03526652 | 0,91803561     | 0,90631738     | -1,17182353        | 0,90013526     | -1,79003514        | 0,90751185     | -1,05237594        | 0,91748152     |                    |         |           |
| EXOC6B          | 2p13.2   | 72980252            | cg22043275 | 0,9273867      | 0,92164293     | -0,57447686        | 0,92327361     | -0,41140906        | 0,92240129     | -0,49864124        | 0,9123978      |                    |         |           |
| TMEM42/ MIR564  | 3p21.31  | 44903463            | cg17410922 | 0,01971145     | 0,02815576     | 0,59966995         | 0,02505004     | 0,533859193        | 0,02553179     | 0,1210032349       | 0,0261009      |                    |         |           |
| TMEM42          | 3p21.31  | 44903516            | cg26889990 | 0,02627839     | 0,03757216     | 1,129377515        | 0,03373567     | 0,745727736        | 0,03086689     | 0,458849959        | 0,035739       |                    |         |           |
| TMEM42          | 3p21.31  | 44903551            | cg24100506 | 0,1013754      | 0,11099755     | 0,962215668        | 0,11420343     | 1,282803364        | 0,11347572     | 1,210032349        | 0,11926623     |                    |         |           |
| intergenic      | 5p15.33  | 3180947             | cg19598479 | 0,92438129     | 0,89855519     | -2,58260919        | 0,90890054     | -1,54807449        | 0,89753832     | -2,68429673        | 0,91132921     |                    |         |           |
| intergenic      | 5p15.33  | 3181925             | cg18894214 | 0,64226355     | 0,55996695     | -8,22065974        | 0,58301147     | -5,92520825        | 0,57219683     | -7,00667188        | 0,6411336      |                    |         |           |
| intergenic      | 5p15.33  | 3182057             | cg06976144 | 0,57952205     | 0,50158956     | -7,79324821        | 0,49293873     | -8,65833134        | 0,51925021     | -6,02718326        | 0,59174962     |                    |         |           |
| intergenic      | 5p15.33  | 3182108             | cg10463207 | 0,76051471     | 0,66919105     | -9,13236606        | 0,68784817     | -7,26665457        | 0,71309048     | -4,74242353        | 0,72550485     |                    |         |           |
| PCDH3           | 5q35.1   | 140479025           | cg23918315 | 0,31395218     | 0,40365934     | 8,970716216        | 0,38509867     | 7,114649217        | 0,36043194     | 4,647976341        | 0,62204091     |                    |         |           |
| PCDH3           | 5q35.1   | 140479979           | cg18782991 | 0,08790681     | 0,09820896     | 1,030214724        | 0,09291149     | 0,500468355        | 0,07910328     | 0,919647451        | 0,16306068     |                    |         |           |
| PCDH3           | 5q35.1   | 140479983           | cg02125910 | 0,12913986     | 0,15138665     | 2,224679094        | 0,14790102     | 1,876116301        | 0,15060559     | 2,146573321        | 0,25499015     |                    |         |           |
| ZNF354C         | 5q35.3   | 178487310           | cg19761115 | 0,02433059     | 0,02913152     | 0,480092445        | 0,02634467     | 0,201407265        | 0,02708241     | 0,275181945        | 0,02929912     |                    |         |           |
| ZNF354C         | 5q35.3   | 178487410           | cg25942031 | 0,01935395     | 0,02437628     | 0,502232899        | 0,02130004     | 0,19460897         | 0,02471592     | 0,536196796        | 0,03184542     |                    |         |           |
| ZNF354C         | 5q35.3   | 178487576           | cg07515940 | 0,04982951     | 0,05355741     | 3,372789713        | 0,05807547     | 0,824595732        | 0,06043144     | 1,060192742        | 0,05170251     |                    |         |           |
| intergenic      | 6p22.1   | 28584121            | cg20839206 | 0,33964339     | 0,36303928     | 0,3239589002       | 0,39059383     | 5,095043579        | 0,37282714     | 3,318374914        | 0,44304833     |                    |         |           |
| intergenic      | 6p22.1   | 28584138            | cg22121557 | 0,16388157     | 0,17231315     | 0,843158342        | 0,237245       | 7,336342501        | 0,16597589     | 0,209431906        | 0,20682112     |                    |         |           |
| intergenic      | 6p22.1   | 28584155            | cg03858673 | 0,14656134     | 0,15847624     | 1,191490072        | 0,19155112     | 4,498977374        | 0,17217122     | 2,560987871        | 0,18470743     |                    |         |           |
| TOMM6           | 6p21.1   | 41755749            | cg06805345 | 0,03828057     | 0,04081941     | 0,253883744        | 0,04051181     | 0,223123358        | 0,04183282     | 0,355224758        | 0,04879169     |                    |         |           |
| TOMM6           | 6p21.1   | 41757330            | cg06487442 | 0,87839034     | 0,86138106     | -1,70092783        | 0,87454587     | -0,38444665        | 0,87083634     | -0,75539995        | 0,88410739     |                    |         |           |
| (next to TOMM6) | 6p21.1   | 41758316            | cg26004268 | 0,92833912     | 0,91291216     | -1,5426955         | 0,92737383     | -0,09652865        | 0,92586752     | -0,24716037        | 0,93577286     |                    |         |           |
| KHDRBS2         | 6q11.1   | 62995963            | cg18239753 | 0,10024395     | 0,09404723     | -0,61967202        | 0,09141659     | -0,88273591        | 0,09342632     | -0,68176331        | 0,13889235     |                    |         |           |
| KHDRBS2         | 6q11.1   | 62996022            | cg16587616 | 0,08533196     | 0,08772047     | 0,238850942        | 0,08883311     | 0,350114442        | 0,09303705     | 0,770509308        | 0,16981207     |                    |         |           |
| KHDRBS2         | 6q11.1   | 62996119            | cg26715952 | 0,05843981     | 0,05173929     | -0,67005246        | 0,04771021     | -1,07296012        | 0,03552747     | -0,49123403        | 0,08408501     |                    |         |           |
| C7orf20         | 7p22.3   | 921092              | cg23397909 | 0,95388827     | 0,93560699     | -1,82812814        | 0,9448417      | -0,90465718        | 0,94260342     | -1,12848538        | 0,9459073      |                    |         |           |
| C7orf20         | 7p22.3   | 921156              | cg20776543 | 0,95633259     | 0,9394422      | -1,68903979        | 0,94709727     | -0,92353225        | 0,94183049     | -1,45021047        | 0,95601521     |                    |         |           |
| C7orf20         | 7p22.3   | 921845              | cg23237765 | 0,77211962     | 0,83081168     | 5,86920547         | 0,84227113     | 7,015150606        | 0,82109765     | 4,897803276        | 0,85329493     |                    |         |           |
| HOXA4           | 7p15.2   | 27169674            | cg11532431 | 0,85141185     | 0,68984574     | -16,1566104        | 0,76030761     | -9,11042356        | 0,78642891     | -6,49829377        | 0,89300425     |                    |         |           |
| HOXA4           | 7p15.2   | 27169740            | cg00562553 | 0,8549225      | 0,76764232     | -8,72801714        | 0,7834087      | -7,14816265        | 0,80474686     | -5,01756405        | 0,87549968     |                    |         |           |
| HOXA4           | 7p15.2   | 27170241            | cg22997113 | 0,75003674     | 0,56856631     | -18,1470436        | 0,60784311     | -14,2193629        | 0,65535283     | -9,46839097        | 0,76124925     |                    |         |           |
| HOXA4           | 7p15.2   | 27170313            | cg04317399 | 0,42394877     | 0,28166768     | -14,2281088        | 0,3272419      | -9,6706868         | 0,36205022     | -6,18985481        | 0,42813642     |                    |         |           |
| HOXA4           | 7p15.2   | 27170388            | cg07317062 | 0,5004445      | 0,30263461     | -19,7809895        | 0,3592233      | -14,1221208        | 0,41879428     | -8,16502236        | 0,51614853     |                    |         |           |
| HOXA4           | 7p15.2   | 27170394            | cg19142026 | 0,42784812     | 0,18110267     | -24,6745442        | 0,22116936     | -20,6678756        | 0,32266609     | -10,1822024        | 0,44274331     |                    |         |           |
| HOXA4           | 7p15.2   | 27170412            | cg11410718 | 0,55407327     | 0,33689131     | -21,7181957        | 0,38788151     | -16,6191757        | 0,44517356     | -10,8899715        | 0,5462584      |                    |         |           |
| HOXA4           | 7p15.2   | 27170717            | cg17457637 | 0,41249307     | 0,26520791     | -14,7285163        | 0,30916349     | -10,3329578        | 0,35393141     | -5,85616566        | 0,43508919     |                    |         |           |
| HOXA4           | 7p15.2   | 27170819            | cg06942814 | 0,53752563     | 0,42205883     | -11,5466807        | 0,44535832     | -9,21673111        | 0,48162604     | -5,58995929        | 0,54667735     |                    |         |           |
| HOXA4           | 7p15.2   | 27170832            | cg08657492 | 0,43518972     | 0,43518972     | -19,9318451        | 0,4788654      | -15,5642764        | 0,54815648     | -8,8692686         | 0,62407349     |                    |         |           |
| HOXA4           | 7p15.2   | 27170880            | cg04321618 | 0,44215924     | 0,31093317     | -13,1226071        | 0,3450797      | -9,70795408        | 0,37759473     | -6,45645113        | 0,46086227     |                    |         |           |
| HOXA4           | 7p15.2   | 27170892            | cg14359292 | 0,37096889     | 0,19475379     | -17,6215094        | 0,22751582     | -14,3453072        | 0,29860079     | -7,23680964        | 0,41349459     |                    |         |           |
| HOXA4           | 7p15.2   | 27170994            | cg24169822 | 0,5003774      | 0,30192753     | -19,8449873        | 0,34403913     | -15,6338278        | 0,39930922     | -10,1068184        | 0,52615346     |                    |         |           |
| HOXA4           | 7p15.2   | 27171051            | cg17591595 | 0,76872748     | 0,66828177     | -10,0445709        | 0,6533831      | -11,5344387        | 0,70811706     | -6,06104218        | 0,78592302     |                    |         |           |
| HOXA4           | 7p15.2   | 27171154            | cg11908057 | 0,84586862     | 0,7774883      | -6,81197922        | 0,76932173     | -7,65468977        | 0,80298622     | -4,28824047        | 0,87928123     |                    |         |           |
| SEPT7           | 7p14.2   | 35840513            | cg17692200 | 0,03714071     | 0,04442006     | 0,727934835        | 0,04494641     | 0,780569796        | 0,04635414     | 0,92134277         | 0,02659296     |                    |         |           |
| SEPT7           | 7p14.2   | 35840534            | cg07462932 | 0,02062471     | 0,02678955     | 0,616483926        | 0,03077139     | 1,014668204        | 0,02709278     | 0,646807016        | 0,03773847     |                    |         |           |
| SEPT7           | 7p14.2   | 35840614            | cg21458073 | 0,02030712     | 0,02489844     | 0,459132071        | 0,02922594     | 0,89188188         | 0,02262465     | 0,591752562        | 0,03420399     |                    |         |           |
| SYPL1           | 7q22.3   | 105752648           | cg14114033 | 0,0465794      | 0,05321224     | 0,663283853        | 0,05753601     | 1,095661213        | 0,05383595     | 0,725654945        | 0,05778413     |                    |         |           |
| SYPL1           | 7q22.3   | 105752920           | cg08159831 | 0,05124604     | 0,06073169     | 0,948564881        | 0,06096873     | 0,972269257        | 0,05839567     | 0,71496279         | 0,05356808     |                    |         |           |
| SYPL1           | 7q22.3   | 105752950           | cg24140629 | 0,01766709     | 0,02170785     | 0,40407632         | 0,03203745     | 1,437035955        | 0,02623039     | 0,85633006         | 0,03259988     |                    |         |           |
| CCAR1           | 10q21.3  | 70481015            | cg09933375 | 0,03102002     | 0,04221601     | 1,11959896         | 0,04093666     | 0,991664225        | 0,03858716     | 0,756714303        | 0,05396052     |                    |         |           |
| CCAR1           | 10q21.3  | 70481056            | cg14623805 | 0,05000859     | 0,04802089     | 0,698770598        | 0,05602317     | 0,800227761        | 0,05286011     | 0,726512626        | 0,04910672     |                    |         |           |
| CCAR1           | 10q21.3  | 70481448            | cg15947099 | 0,04920143     | 0,05718848     | 0,798705351        | 0,06704029     | 1,783886538        | 0,06297723     | 1,377580433        | 0,06478024     |                    |         |           |
| SBF2            | 11p15.4  | 10315754            | cg04415045 | 0,02646204     | 0,03604813     | 0,958608255        | 0,02799783     | 0,153578351        | 0,03248118     | 0,601914177        | 0,0335297      |                    |         |           |
| SBF2            | 11p15.4  | 10315759            | cg04313601 | 0,01707315     | 0,02127807     | 0,420491968        | 0,02055443     | 0,348127297        | 0,02071264     | 0,363948777        | 0,02467506     |                    |         |           |
| SBF2            | 11p15.4  | 10315761            | cg26975351 | 0,0214235      | 0,03105183     | 0,96283365         | 0,02447033     | 0,304683763        | 0,02706036     | 0,563686733        | 0,04003213     |                    |         |           |
| SBF2            | 11p15.4  | 10315914            | cg01222603 | 0,01903755     | 0,01903755     | 0,505205421        | 0,0252705      | 0,623294348        | 0,02271478     | 0,367722048        | 0,02779186     |                    |         |           |
| HOXC8           | 12q13.13 | 54403178            | cg02344911 | 0,05811968     | 0,05999831     | 0,187862644        | 0,06122353     | 0,310384996        | 0,07054091     | 1,242122834        | 0,09199748     |                    |         |           |
| HOXC8           | 12q13.13 | 54403254            | cg05022306 | 0,03691178     | 0,04086109     | 0,394931057        | 0,04027167     | 0,335988301        | 0,03975679     | 0,284500509        | 0,04577613     |                    |         |           |
| HOXC8           | 12q13.13 | 54403314            | cg19634247 | 0,0793595      | 0,08202438     | 0,266487762        | 0,08175922     | 0,239971322        | 0,08250429     | 0,314478166        | 0,09444207     |                    |         |           |
| EEA1            | 12q22    | 93323267            | cg18580865 | 0,05746306     | 0,06424879     | 0,678573033        | 0,06511097     | 0,764790977        | 0,06191641     | 0,445334809        | 0,05765298     |                    |         |           |

|               |          |          |            |            |            |             |            |             |            |             |            |
|---------------|----------|----------|------------|------------|------------|-------------|------------|-------------|------------|-------------|------------|
| EEA1          | 12q22    | 93323273 | cg00140235 | 0,05989214 | 0,07723201 | 1,7339872   | 0,06697895 | 0,708680938 | 0,07492424 | 1,503210683 | 0,06891763 |
| EEA1          | 12q22    | 93323276 | cg11643463 | 0,01686483 | 0,02166734 | 0,480250338 | 0,01928046 | 0,241562725 | 0,02305902 | 0,619418746 | 0,02013048 |
| TMEM62        | 15q15.2  | 43425591 | cg02257533 | 0,04380553 | 0,04857827 | 0,477273886 | 0,04906932 | 0,526379389 | 0,04807121 | 0,42656823  | 0,05698485 |
| TMEM62        | 15q15.2  | 43425644 | cg11184154 | 0,028106   | 0,03816653 | 1,006052949 | 0,03443497 | 0,63289722  | 0,03651831 | 0,841231776 | 0,03734723 |
| TMEM62        | 15q15.2  | 43425698 | cg21541406 | 0,03051882 | 0,0385164  | 0,799757929 | 0,04247226 | 1,195344242 | 0,03279762 | 0,227879951 | 0,04213404 |
| DUOX1/DUOX1   | 15q21.1  | 45422054 | cg24505618 | 0,09837758 | 0,10115284 | 0,27752613  | 0,0985795  | 0,020191958 | 0,10482055 | 0,64429686  | 0,11738599 |
| DUOX1/DUOX1   | 15q21.1  | 45422062 | cg05804220 | 0,05187628 | 0,05379345 | 0,191717287 | 0,058052   | 0,617571614 | 0,0588128  | 0,693652247 | 0,06546444 |
| DUOX1/DUOX1   | 15q21.1  | 45422083 | cg10496082 | 0,02333679 | 0,02706994 | 0,37331562  | 0,02945029 | 0,611349951 | 0,02999788 | 0,666108889 | 0,02986442 |
| ALOX12B       | 17p13.1  | 7982773  | cg05704893 | 0,05210596 | 0,05953752 | 0,743155466 | 0,05393622 | 0,183025715 | 0,05649147 | 0,438551068 | 0,06057261 |
| ALOX12B       | 17p13.1  | 7982806  | cg27619163 | 0,04355639 | 0,05403348 | 1,047709057 | 0,05381978 | 1,026339054 | 0,05291865 | 0,936225194 | 0,05099039 |
| ALOX12B       | 17p13.1  | 7982898  | cg25874034 | 0,05599857 | 0,06249253 | 0,649396391 | 0,0596896  | 0,369102675 | 0,06165944 | 0,566087575 | 0,0514447  |
| CCR10/CNTNAP1 | 17q21.2  | 40834836 | cg24213196 | 0,06002245 | 0,06372768 | 0,370523178 | 0,06477816 | 0,475571134 | 0,06660413 | 0,6581684   | 0,07597042 |
| CCR10/CNTNAP1 | 17q21.2  | 40834984 | cg03107659 | 0,04566444 | 0,04590329 | 0,023885481 | 0,05103244 | 0,536800456 | 0,05302699 | 0,736255043 | 0,06278209 |
| CCR10/CNTNAP1 | 17q21.2  | 40835003 | cg13052543 | 0,02575399 | 0,03023847 | 0,448448753 | 0,0300722  | 0,431821022 | 0,03240161 | 0,664762149 | 0,04583628 |
| RPRML         | 17q21.32 | 45056634 | cg16179976 | 0,02484074 | 0,03020001 | 0,535927057 | 0,02820822 | 0,336748451 | 0,02770668 | 0,286594091 | 0,0304294  |
| RPRML         | 17q21.32 | 45056646 | cg05955013 | 0,03223454 | 0,04226755 | 1,003300879 | 0,03916534 | 0,693080018 | 0,04181226 | 0,957772177 | 0,04235782 |
| RPRML         | 17q21.32 | 45056795 | cg05302784 | 0,03667496 | 0,04069536 | 0,402040388 | 0,0399717  | 0,329673737 | 0,04127702 | 0,460205919 | 0,04205833 |
| SNRPD1        | 18q11.2  | 19192308 | cg12351856 | 0,08393942 | 0,09372076 | 0,97813383  | 0,10528998 | 2,135056221 | 0,09026154 | 0,632211995 | 0,0926109  |
| SNRPD1        | 18q11.2  | 19192384 | cg17797182 | 0,05831564 | 0,06644402 | 0,812838848 | 0,06107692 | 0,276128856 | 0,06272329 | 0,440765541 | 0,05760342 |
| SNRPD1        | 18q11.2  | 19192502 | cg21774115 | 0,03305989 | 0,03957597 | 0,651608298 | 0,03819727 | 0,513738145 | 0,03808708 | 0,502719304 | 0,03839672 |
| NXT1          | 20p11.21 | 23331282 | cg26752655 | 0,05778631 | 0,06361233 | 0,582601608 | 0,06251635 | 0,473003358 | 0,06324033 | 0,545401406 | 0,06528438 |
| NXT1          | 20p11.21 | 23331308 | cg00982357 | 0,04205213 | 0,049318   | 0,726587642 | 0,05006575 | 0,801362243 | 0,05121845 | 0,916632952 | 0,05214387 |
| NXT1          | 20p11.21 | 23331342 | cg23040205 | 0,03107059 | 0,03872674 | 0,765614781 | 0,03997682 | 0,890622433 | 0,0389554  | 0,788480753 | 0,04798031 |
| COL9A3        | 20q13.33 | 61447982 | cg13900920 | 0,03802974 | 0,03864856 | 0,061881879 | 0,04595747 | 0,792772193 | 0,04522656 | 0,719681267 | 0,0469943  |
| COL9A3        | 20q13.33 | 61447992 | cg11698944 | 0,0293184  | 0,03372083 | 0,44024306  | 0,03137075 | 0,205234451 | 0,03537724 | 0,605883655 | 0,04155202 |
| COL9A3        | 20q13.33 | 61448079 | cg21686379 | 0,03956502 | 0,04279475 | 0,322972466 | 0,04068906 | 0,112403938 | 0,04446128 | 0,489625654 | 0,05231246 |

Supplementary table 2. Methylation status for each individual and *H19* gene region measured by Illumina 450K BeadChip assay. Hypomethylated sites, with methylation below -2SD of the control level, are marked in green. Hypermethylated sites, with methylation level above +2SD of the control level, are marked in red.

|           | cg02864690 | cg09452478 | cg16574793 | cg02657360 | cg02886509 | cg25579157 | cg25821896 | cg06765785 | cg00237904 | cg23476401 | cg01895612 | cg25281616 | cg27300742 | cg18104242 | cg03996735 | cg16675558 | cg24510613 | cg06749854 | cg04817190 | cg24605090 | cg18362496 | cg01539474 | cg04088212 | cg13581483 | cg25838645 | cg01977486 | cg11735853 | cg02694715 | cg16303279 | cg24409677 | cg26469586 | cg10154633 | cg25437674 | cg09701145 | cg17985533 | cg13210239 |  |  |
|-----------|------------|------------|------------|------------|------------|------------|------------|------------|------------|------------|------------|------------|------------|------------|------------|------------|------------|------------|------------|------------|------------|------------|------------|------------|------------|------------|------------|------------|------------|------------|------------|------------|------------|------------|------------|------------|--|--|
| group     |            |            |            |            |            |            |            |            |            |            |            |            |            |            |            |            |            |            |            |            |            |            |            |            |            |            |            |            |            |            |            |            |            |            |            |            |  |  |
| 11p15 LOM |            |            |            |            |            |            |            |            |            |            |            |            |            |            |            |            |            |            |            |            |            |            |            |            |            |            |            |            |            |            |            |            |            |            |            |            |  |  |
| 11p15 LOM |            |            |            |            |            |            |            |            |            |            |            |            |            |            |            |            |            |            |            |            |            |            |            |            |            |            |            |            |            |            |            |            |            |            |            |            |  |  |
| 11p15 LOM |            |            |            |            |            |            |            |            |            |            |            |            |            |            |            |            |            |            |            |            |            |            |            |            |            |            |            |            |            |            |            |            |            |            |            |            |  |  |
| 11p15 LOM |            |            |            |            |            |            |            |            |            |            |            |            |            |            |            |            |            |            |            |            |            |            |            |            |            |            |            |            |            |            |            |            |            |            |            |            |  |  |
| 11p15 LOM |            |            |            |            |            |            |            |            |            |            |            |            |            |            |            |            |            |            |            |            |            |            |            |            |            |            |            |            |            |            |            |            |            |            |            |            |  |  |
| 11p15 LOM |            |            |            |            |            |            |            |            |            |            |            |            |            |            |            |            |            |            |            |            |            |            |            |            |            |            |            |            |            |            |            |            |            |            |            |            |  |  |
| 11p15 LOM |            |            |            |            |            |            |            |            |            |            |            |            |            |            |            |            |            |            |            |            |            |            |            |            |            |            |            |            |            |            |            |            |            |            |            |            |  |  |
| 11p15 LOM |            |            |            |            |            |            |            |            |            |            |            |            |            |            |            |            |            |            |            |            |            |            |            |            |            |            |            |            |            |            |            |            |            |            |            |            |  |  |
| 11p15 LOM |            |            |            |            |            |            |            |            |            |            |            |            |            |            |            |            |            |            |            |            |            |            |            |            |            |            |            |            |            |            |            |            |            |            |            |            |  |  |
| 11p15 LOM |            |            |            |            |            |            |            |            |            |            |            |            |            |            |            |            |            |            |            |            |            |            |            |            |            |            |            |            |            |            |            |            |            |            |            |            |  |  |
| 11p15 LOM |            |            |            |            |            |            |            |            |            |            |            |            |            |            |            |            |            |            |            |            |            |            |            |            |            |            |            |            |            |            |            |            |            |            |            |            |  |  |
| 11p15 LOM |            |            |            |            |            |            |            |            |            |            |            |            |            |            |            |            |            |            |            |            |            |            |            |            |            |            |            |            |            |            |            |            |            |            |            |            |  |  |
| 11p15 LOM |            |            |            |            |            |            |            |            |            |            |            |            |            |            |            |            |            |            |            |            |            |            |            |            |            |            |            |            |            |            |            |            |            |            |            |            |  |  |
| 11p15 LOM |            |            |            |            |            |            |            |            |            |            |            |            |            |            |            |            |            |            |            |            |            |            |            |            |            |            |            |            |            |            |            |            |            |            |            |            |  |  |
| 11p15 LOM |            |            |            |            |            |            |            |            |            |            |            |            |            |            |            |            |            |            |            |            |            |            |            |            |            |            |            |            |            |            |            |            |            |            |            |            |  |  |
| 11p15 LOM |            |            |            |            |            |            |            |            |            |            |            |            |            |            |            |            |            |            |            |            |            |            |            |            |            |            |            |            |            |            |            |            |            |            |            |            |  |  |
| 11p15 LOM |            |            |            |            |            |            |            |            |            |            |            |            |            |            |            |            |            |            |            |            |            |            |            |            |            |            |            |            |            |            |            |            |            |            |            |            |  |  |
| 11p15 LOM |            |            |            |            |            |            |            |            |            |            |            |            |            |            |            |            |            |            |            |            |            |            |            |            |            |            |            |            |            |            |            |            |            |            |            |            |  |  |
| 11p15 LOM |            |            |            |            |            |            |            |            |            |            |            |            |            |            |            |            |            |            |            |            |            |            |            |            |            |            |            |            |            |            |            |            |            |            |            |            |  |  |
| 11p15 LOM |            |            |            |            |            |            |            |            |            |            |            |            |            |            |            |            |            |            |            |            |            |            |            |            |            |            |            |            |            |            |            |            |            |            |            |            |  |  |
| 11p15 LOM |            |            |            |            |            |            |            |            |            |            |            |            |            |            |            |            |            |            |            |            |            |            |            |            |            |            |            |            |            |            |            |            |            |            |            |            |  |  |
| 11p15 LOM |            |            |            |            |            |            |            |            |            |            |            |            |            |            |            |            |            |            |            |            |            |            |            |            |            |            |            |            |            |            |            |            |            |            |            |            |  |  |
| 11p15 LOM |            |            |            |            |            |            |            |            |            |            |            |            |            |            |            |            |            |            |            |            |            |            |            |            |            |            |            |            |            |            |            |            |            |            |            |            |  |  |
| 11p15 LOM |            |            |            |            |            |            |            |            |            |            |            |            |            |            |            |            |            |            |            |            |            |            |            |            |            |            |            |            |            |            |            |            |            |            |            |            |  |  |
| 11p15 LOM |            |            |            |            |            |            |            |            |            |            |            |            |            |            |            |            |            |            |            |            |            |            |            |            |            |            |            |            |            |            |            |            |            |            |            |            |  |  |
| 11p15 LOM |            |            |            |            |            |            |            |            |            |            |            |            |            |            |            |            |            |            |            |            |            |            |            |            |            |            |            |            |            |            |            |            |            |            |            |            |  |  |
| 11p15 LOM |            |            |            |            |            |            |            |            |            |            |            |            |            |            |            |            |            |            |            |            |            |            |            |            |            |            |            |            |            |            |            |            |            |            |            |            |  |  |
| 11p15 LOM |            |            |            |            |            |            |            |            |            |            |            |            |            |            |            |            |            |            |            |            |            |            |            |            |            |            |            |            |            |            |            |            |            |            |            |            |  |  |
| 11p15 LOM |            |            |            |            |            |            |            |            |            |            |            |            |            |            |            |            |            |            |            |            |            |            |            |            |            |            |            |            |            |            |            |            |            |            |            |            |  |  |
| 11p15 LOM |            |            |            |            |            |            |            |            |            |            |            |            |            |            |            |            |            |            |            |            |            |            |            |            |            |            |            |            |            |            |            |            |            |            |            |            |  |  |
| 11p15 LOM |            |            |            |            |            |            |            |            |            |            |            |            |            |            |            |            |            |            |            |            |            |            |            |            |            |            |            |            |            |            |            |            |            |            |            |            |  |  |
| 11p15 LOM |            |            |            |            |            |            |            |            |            |            |            |            |            |            |            |            |            |            |            |            |            |            |            |            |            |            |            |            |            |            |            |            |            |            |            |            |  |  |
| 11p15 LOM |            |            |            |            |            |            |            |            |            |            |            |            |            |            |            |            |            |            |            |            |            |            |            |            |            |            |            |            |            |            |            |            |            |            |            |            |  |  |
| 11p15 LOM |            |            |            |            |            |            |            |            |            |            |            |            |            |            |            |            |            |            |            |            |            |            |            |            |            |            |            |            |            |            |            |            |            |            |            |            |  |  |
| 11p15 LOM |            |            |            |            |            |            |            |            |            |            |            |            |            |            |            |            |            |            |            |            |            |            |            |            |            |            |            |            |            |            |            |            |            |            |            |            |  |  |
| 11p15 LOM |            |            |            |            |            |            |            |            |            |            |            |            |            |            |            |            |            |            |            |            |            |            |            |            |            |            |            |            |            |            |            |            |            |            |            |            |  |  |
| 11p15 LOM |            |            |            |            |            |            |            |            |            |            |            |            |            |            |            |            |            |            |            |            |            |            |            |            |            |            |            |            |            |            |            |            |            |            |            |            |  |  |
| 11p15 LOM |            |            |            |            |            |            |            |            |            |            |            |            |            |            |            |            |            |            |            |            |            |            |            |            |            |            |            |            |            |            |            |            |            |            |            |            |  |  |
| 11p15 LOM |            |            |            |            |            |            |            |            |            |            |            |            |            |            |            |            |            |            |            |            |            |            |            |            |            |            |            |            |            |            |            |            |            |            |            |            |  |  |
| 11p15 LOM |            |            |            |            |            |            |            |            |            |            |            |            |            |            |            |            |            |            |            |            |            |            |            |            |            |            |            |            |            |            |            |            |            |            |            |            |  |  |
| 11p15 LOM |            |            |            |            |            |            |            |            |            |            |            |            |            |            |            |            |            |            |            |            |            |            |            |            |            |            |            |            |            |            |            |            |            |            |            |            |  |  |
| 11p15 LOM |            |            |            |            |            |            |            |            |            |            |            |            |            |            |            |            |            |            |            |            |            |            |            |            |            |            |            |            |            |            |            |            |            |            |            |            |  |  |
| 11p15 LOM |            |            |            |            |            |            |            |            |            |            |            |            |            |            |            |            |            |            |            |            |            |            |            |            |            |            |            |            |            |            |            |            |            |            |            |            |  |  |
| 11p15 LOM |            |            |            |            |            |            |            |            |            |            |            |            |            |            |            |            |            |            |            |            |            |            |            |            |            |            |            |            |            |            |            |            |            |            |            |            |  |  |
| 11p15 LOM |            |            |            |            |            |            |            |            |            |            |            |            |            |            |            |            |            |            |            |            |            |            |            |            |            |            |            |            |            |            |            |            |            |            |            |            |  |  |
| 11p15 LOM |            |            |            |            |            |            |            |            |            |            |            |            |            |            |            |            |            |            |            |            |            |            |            |            |            |            |            |            |            |            |            |            |            |            |            |            |  |  |
| 11p15 LOM |            |            |            |            |            |            |            |            |            |            |            |            |            |            |            |            |            |            |            |            |            |            |            |            |            |            |            |            |            |            |            |            |            |            |            |            |  |  |
| 11p15 LOM |            |            |            |            |            |            |            |            |            |            |            |            |            |            |            |            |            |            |            |            |            |            |            |            |            |            |            |            |            |            |            |            |            |            |            |            |  |  |
| 11p15 LOM |            |            |            |            |            |            |            |            |            |            |            |            |            |            |            |            |            |            |            |            |            |            |            |            |            |            |            |            |            |            |            |            |            |            |            |            |  |  |
| 11p15 LOM |            |            |            |            |            |            |            |            |            |            |            |            |            |            |            |            |            |            |            |            |            |            |            |            |            |            |            |            |            |            |            |            |            |            |            |            |  |  |
| 11p15 LOM |            |            |            |            |            |            |            |            |            |            |            |            |            |            |            |            |            |            |            |            |            |            |            |            |            |            |            |            |            |            |            |            |            |            |            |            |  |  |
| 11p15 LOM |            |            |            |            |            |            |            |            |            |            |            |            |            |            |            |            |            |            |            |            |            |            |            |            |            |            |            |            |            |            |            |            |            |            |            |            |  |  |
| 11p15 LOM |            |            |            |            |            |            |            |            |            |            |            |            |            |            |            |            |            |            |            |            |            |            |            |            |            |            |            |            |            |            |            |            |            |            |            |            |  |  |
| 11p15 LOM |            |            |            |            |            |            |            |            |            |            |            |            |            |            |            |            |            |            |            |            |            |            |            |            |            |            |            |            |            |            |            |            |            |            |            |            |  |  |
| 11p15 LOM |            |            |            |            |            |            |            |            |            |            |            |            |            |            |            |            |            |            |            |            |            |            |            |            |            |            |            |            |            |            |            |            |            |            |            |            |  |  |
| 11p15 LOM |            |            |            |            |            |            |            |            |            |            |            |            |            |            |            |            |            |            |            |            |            |            |            |            |            |            |            |            |            |            |            |            |            |            |            |            |  |  |
| 11p15 LOM |            |            |            |            |            |            |            |            |            |            |            |            |            |            |            |            |            |            |            |            |            |            |            |            |            |            |            |            |            |            |            |            |            |            |            |            |  |  |
| 11p15 LOM |            |            |            |            |            |            |            |            |            |            |            |            |            |            |            |            |            |            |            |            |            |            |            |            |            |            |            |            |            |            |            |            |            |            |            |            |  |  |
| 11p15 LOM |            |            |            |            |            |            |            |            |            |            |            |            |            |            |            |            |            |            |            |            |            |            |            |            |            |            |            |            |            |            |            |            |            |            |            |            |  |  |
| 11p15 LOM |            |            |            |            |            |            |            |            |            |            |            |            |            |            |            |            |            |            |            |            |            |            |            |            |            |            |            |            |            |            |            |            |            |            |            |            |  |  |
| 11p15 LOM |            |            |            |            |            |            |            |            |            |            |            |            |            |            |            |            |            |            |            |            |            |            |            |            |            |            |            |            |            |            |            |            |            |            |            |            |  |  |
| 11p15 LOM |            |            |            |            |            |            |            |            |            |            |            |            |            |            |            |            |            |            |            |            |            |            |            |            |            |            |            |            |            |            |            |            |            |            |            |            |  |  |
| 11p15 LOM |            |            |            |            |            |            |            |            |            |            |            |            |            |            |            |            |            |            |            |            |            |            |            |            |            |            |            |            |            |            |            |            |            |            |            |            |  |  |
| 11p15 LOM |            |            |            |            |            |            |            |            |            |            |            |            |            |            |            |            |            |            |            |            |            |            |            |            |            |            |            |            |            |            |            |            |            |            |            |            |  |  |
| 11p15 LOM |            |            |            |            |            |            |            |            |            |            |            |            |            |            |            |            |            |            |            |            |            |            |            |            |            |            |            |            |            |            |            |            |            |            |            |            |  |  |
| 11p15 LOM |            |            |            |            |            |            |            |            |            |            |            |            |            |            |            |            |            |            |            |            |            |            |            |            |            |            |            |            |            |            |            |            |            |            |            |            |  |  |
| 11p15 LOM |            |            |            |            |            |            |            |            |            |            |            |            |            |            |            |            |            |            |            |            |            |            |            |            |            |            |            |            |            |            |            |            |            |            |            |            |  |  |
| 11p15 LOM |            |            |            |            |            |            |            |            |            |            |            |            |            |            |            |            |            |            |            |            |            |            |            |            |            |            |            |            |            |            |            |            |            |            |            |            |  |  |
| 11p15 LOM |            |            |            |            |            |            |            |            |            |            |            |            |            |            |            |            |            |            |            |            |            |            |            |            |            |            |            |            |            |            |            |            |            |            |            |            |  |  |







Supplementary table 4. List of height-associated SNPs.

| SNP        | Publications                                                                                                                                                                                                                                                                                                                                                                                               |
|------------|------------------------------------------------------------------------------------------------------------------------------------------------------------------------------------------------------------------------------------------------------------------------------------------------------------------------------------------------------------------------------------------------------------|
| rs1042725  | Lettre G, Jackson AU, Gieger C, et al. Identification of ten loci associated with height highlights new biological pathways in human growth. <i>Nature genetics</i> . 2008;40(5):584-591. doi:10.1038/ng.125.<br>Weedon MN, Lango H, Lindgren CM, et al. Genome-wide association analysis identifies 20 loci that influence adult height. <i>Nature genetics</i> . 2008;40(5):575-583. doi:10.1038/ng.121. |
| rs10946808 | Lettre G, Jackson AU, Gieger C, et al. Identification of ten loci associated with height highlights new biological pathways in human growth. <i>Nature genetics</i> . 2008;40(5):584-591. doi:10.1038/ng.125.                                                                                                                                                                                              |
| rs6060369  | Lettre G, Jackson AU, Gieger C, et al. Identification of ten loci associated with height highlights new biological pathways in human growth. <i>Nature genetics</i> . 2008;40(5):584-591. doi:10.1038/ng.125.                                                                                                                                                                                              |
| rs8007661  | Lettre G, Jackson AU, Gieger C, et al. Identification of ten loci associated with height highlights new biological pathways in human growth. <i>Nature genetics</i> . 2008;40(5):584-591. doi:10.1038/ng.125.                                                                                                                                                                                              |
| rs314277   | Lettre G, Jackson AU, Gieger C, et al. Identification of ten loci associated with height highlights new biological pathways in human growth. <i>Nature genetics</i> . 2008;40(5):584-591. doi:10.1038/ng.125.                                                                                                                                                                                              |
| rs2562784  | Lettre G, Jackson AU, Gieger C, et al. Identification of ten loci associated with height highlights new biological pathways in human growth. <i>Nature genetics</i> . 2008;40(5):584-591. doi:10.1038/ng.125.                                                                                                                                                                                              |
| rs2282978  | Weedon MN, Lango H, Lindgren CM, et al. Genome-wide association analysis identifies 20 loci that influence adult height. <i>Nature genetics</i> . 2008;40(5):575-583. doi:10.1038/ng.121.                                                                                                                                                                                                                  |
| rs2814993  | Weedon MN, Lango H, Lindgren CM, et al. Genome-wide association analysis identifies 20 loci that influence adult height. <i>Nature genetics</i> . 2008;40(5):575-583. doi:10.1038/ng.121.                                                                                                                                                                                                                  |
| rs11107116 | Weedon MN, Lango H, Lindgren CM, et al. Genome-wide association analysis identifies 20 loci that influence adult height. <i>Nature genetics</i> . 2008;40(5):575-583. doi:10.1038/ng.121.                                                                                                                                                                                                                  |
| rs6854783  | Weedon MN, Lango H, Lindgren CM, et al. Genome-wide association analysis identifies 20 loci that influence adult height. <i>Nature genetics</i> . 2008;40(5):575-583. doi:10.1038/ng.121.                                                                                                                                                                                                                  |

| <b>Correlation of methylation and expression level in <i>HOXA4</i></b> |          |          |          |
|------------------------------------------------------------------------|----------|----------|----------|
|                                                                        | <b>r</b> | <b>n</b> | <b>p</b> |
| cg11532431                                                             | -0,77    | 20       | 7,20E-05 |
| cg00562553                                                             | -0,76    | 20       | 9,80E-05 |
| cg22997113                                                             | -0,81    | 20       | 1,40E-05 |
| cg04317399                                                             | -0,72    | 20       | 3,71E-04 |
| cg07317062                                                             | -0,67    | 20       | 1,21E-03 |
| cg19142026                                                             | -0,72    | 20       | 3,87E-04 |
| cg11410718                                                             | -0,68    | 20       | 1,01E-03 |
| cg17457637                                                             | -0,76    | 20       | 8,80E-05 |
| cg06942814                                                             | -0,72    | 20       | 3,00E-04 |
| cg08657492                                                             | -0,72    | 20       | 3,00E-04 |
| cg04321618                                                             | -0,72    | 20       | 3,00E-04 |
| cg14359292                                                             | -0,72    | 20       | 3,13E-04 |
| cg25952581                                                             | -0,71    | 20       | 4,94E-04 |
| cg24169822                                                             | -0,69    | 20       | 6,75E-04 |
| cg17591595                                                             | -0,70    | 20       | 6,25E-04 |
| cg11908057                                                             | -0,58    | 20       | 6,75E-03 |
| Average methylation<br>ln SD scale                                     | -0,75    | 20       | 1,38E-04 |

Supplementary table 5. Spearman correlation analysis for methylation level of *HOXA4* area CpGs and expression level of *HOXA4* in UPD(7)mat, UPD(7)pat and control samples.

Supplementary table 6. Clinical information on SRS patients.

| Patient           | Birth weight SD | Birth length SD | Birth weight and/or birth length less than or equal to -2SDS for gestational age | postnatal growth in SD at closest measurement to age 24 months | Postnatal growth less than or equal to -2SD in closest available measurement to age 24 months | leg and/or body asymmetry | protruding forehead | relative macrocephaly | feeding difficulties | Score (fulfilled criteria, out of 6) |
|-------------------|-----------------|-----------------|----------------------------------------------------------------------------------|----------------------------------------------------------------|-----------------------------------------------------------------------------------------------|---------------------------|---------------------|-----------------------|----------------------|--------------------------------------|
| 11p15 LOM         | -4,7            | -6,9            | +                                                                                | -6,0                                                           | +                                                                                             | ?                         | +                   | +                     | n/a                  | 4                                    |
| 11p15 LOM         | -3,2            | -3,5            | +                                                                                | -2,4                                                           | +                                                                                             | +                         | +                   | +                     | -                    | 5                                    |
| 11p15 LOM         | -5,5            | -6,4            | +                                                                                | -5,8                                                           | +                                                                                             | +                         | +                   | +                     | -                    | 5                                    |
| 11p15 LOM         | -1,8            | -2,0            | +                                                                                | -3,2                                                           | +                                                                                             | +                         | +                   | +                     | -                    | 5                                    |
| 11p15 LOM         | -4,2            | -6,7            | +                                                                                | -6,3                                                           | +                                                                                             | +                         | +                   | +                     | -                    | 5                                    |
| 11p15 LOM         | -4,8            | -6,6            | +                                                                                | -5,8                                                           | +                                                                                             | +                         | +                   | +                     | +                    | 6                                    |
| 11p15 LOM         | -4,7            | -7,2            | +                                                                                | -3,4                                                           | +                                                                                             | +                         | +                   | +                     | -                    | 5                                    |
| 11p15 LOM         | -3,8            | -4,2            | +                                                                                | -5,0                                                           | +                                                                                             | +                         | +                   | +                     | +                    | 6                                    |
| 11p15 LOM         | -4,2            | -5,8            | +                                                                                | -5,8                                                           | +                                                                                             | +                         | +                   | +                     | -                    | 5                                    |
| 11p15 LOM         | -4,6            | -5,2            | +                                                                                | -3,7                                                           | +                                                                                             | +                         | +                   | +                     | +                    | 6                                    |
| 11p15 LOM         | -3,7            | -3,3            | +                                                                                | -2,6                                                           | +                                                                                             | +                         | +                   | -                     | n/a                  | 4                                    |
| 11p15 LOM         | -5,2            | -5,3            | +                                                                                | -4,8                                                           | +                                                                                             | +                         | +                   | n/a                   | -                    | 4                                    |
| 11p15 LOM         | -3,8            | -4,3            | +                                                                                | -4,8                                                           | +                                                                                             | +                         | +                   | +                     | +                    | 6                                    |
| 11p15 LOM         | -4,0            | -5,2            | +                                                                                | -4,2                                                           | +                                                                                             | +                         | +                   | +                     | +                    | 6                                    |
| 11p15 LOM         | -2,1            | -1,7            | +                                                                                | -3,5                                                           | +                                                                                             | +                         | +                   | +                     | -                    | 5                                    |
| 11p15 LOM         | -3,6            | -3,2            | +                                                                                | -4,2                                                           | +                                                                                             | -                         | +                   | +                     | +                    | 5                                    |
| 11p15 LOM         | -3,6            | -4,9            | +                                                                                | -5,6                                                           | +                                                                                             | +                         | +                   | +                     | n/a                  | 5                                    |
| 11p15 LOM         | n/a             | -4,0            | +                                                                                | -3,6                                                           | +                                                                                             | n/a                       | +                   | n/a                   | n/a                  | 3                                    |
| 11p15 LOM         | -5,0            | -6,6            | +                                                                                | -4,0                                                           | +                                                                                             | +                         | +                   | +                     | -                    | 5                                    |
| 11p15 LOM         | -4,5            | -4,7            | +                                                                                | -3,4                                                           | +                                                                                             | n/a                       | +                   | +                     | n/a                  | 4                                    |
| 11p15 LOM         | -3,3            | -5,4            | +                                                                                | -4                                                             | +                                                                                             | +                         | +                   | +                     | n/a                  | 5                                    |
| clinical SRS      | -4,3            | -4,6            | +                                                                                | -3,6                                                           | +                                                                                             | +                         | +                   | +                     | n/a                  | 5                                    |
| clinical SRS      | -3,6            | -4,1            | +                                                                                | n/a                                                            | n/a                                                                                           | -                         | +                   | -                     | n/a                  | 2                                    |
| clinical SRS      | -4,9            | -4,6            | +                                                                                | -2,0                                                           | +                                                                                             | -                         | +                   | +                     | +                    | 5                                    |
| clinical SRS      | -2,0            | -2,3            | +                                                                                | -3,4                                                           | +                                                                                             | n/a                       | +                   | +                     | ?                    | 4                                    |
| clinical SRS      | -3,6            | -4,1            | +                                                                                | -4,1                                                           | +                                                                                             | +                         | +                   | +                     | n/a                  | 5                                    |
| clinical SRS      | -2,8            | -2,4            | +                                                                                | -4                                                             | +                                                                                             | -                         | +                   | +                     | n/a                  | 4                                    |
| clinical SRS      | -2,4            | -2,5            | +                                                                                | -2,5                                                           | +                                                                                             | ?                         | +                   | +                     | n/a                  | 4                                    |
| clinical SRS      | -3,3            | -4,7            | +                                                                                | -5,5                                                           | +                                                                                             | -                         | +                   | +                     | +                    | 5                                    |
| clinical SRS      | -4,2            | -5,7            | +                                                                                | -3,4                                                           | +                                                                                             | -                         | -                   | +                     | +                    | 4                                    |
| clinical SRS      | -2,4            | -3,4            | +                                                                                | -3,9                                                           | +                                                                                             | -                         | -                   | +                     | -                    | 3                                    |
| clinical SRS      | -2,2            | -1,2            | +                                                                                | -2,6                                                           | +                                                                                             | +                         | n/a                 | n/a                   | n/a                  | 3                                    |
| clinical SRS      | -3,4            | -4,5            | +                                                                                | -3,8                                                           | +                                                                                             | -                         | +                   | +                     | -                    | 4                                    |
| clinical SRS      | -4,8            | -5,8            | +                                                                                | -4                                                             | +                                                                                             | -                         | +                   | +                     | n/a                  | 4                                    |
| UPD(7)mat         | -3,7            | -4,8            | +                                                                                | -6,8                                                           | +                                                                                             | +                         | +                   | +                     | +                    | 6                                    |
| UPD(7)mat         | -2,5            | -3,8            | +                                                                                | -2,8                                                           | +                                                                                             | +                         | +                   | +                     | +                    | 6                                    |
| UPD(7)mat         | -2,8            | -1,8            | +                                                                                | -4,6                                                           | +                                                                                             | -                         | +                   | +                     | +                    | 5                                    |
| UPD(7)mat         | -2,7            | -3,4            | +                                                                                | -3,8                                                           | +                                                                                             | -                         | +                   | +                     | +                    | 5                                    |
| UPD(7)mat         | -2,6            | -2,0            | +                                                                                | -3,7                                                           | +                                                                                             | -                         | +                   | +                     | +                    | 5                                    |
| UPD(7)mat         | -2,2            | -3,5            | +                                                                                | -6,2                                                           | +                                                                                             | -                         | +                   | +                     | +                    | 5                                    |
| UPD(7)mat         | -2,2            | -3,2            | +                                                                                | -4,8                                                           | +                                                                                             | -                         | +                   | +                     | n/a                  | 4                                    |
| UPD(7)mat         | -3,8            | -4,1            | +                                                                                | -5,0                                                           | +                                                                                             | +                         | +                   | +                     | ?                    | 5                                    |
| UPD(7)mat         | -3,2            | -3,7            | +                                                                                | -5,2                                                           | +                                                                                             | -                         | +                   | +                     | +                    | 5                                    |
| UPD(7q31-qter)mat | -4,5            | -5,2            | +                                                                                | -3,0                                                           | +                                                                                             | -                         | +                   | +                     | +                    | 5                                    |

Supplementary table 7. Clinical information on SGR patients.

| Patient | Birth weight SD | Birth length SD | Birth weight and/or birth length less than or equal to -2SD for gestational age | postnatal growth in SD at closest measurement to age 24 months | Postnatal growth less than or equal to -2SD in closest available measurement to age 24 months |
|---------|-----------------|-----------------|---------------------------------------------------------------------------------|----------------------------------------------------------------|-----------------------------------------------------------------------------------------------|
| SGR     | n/a             | -2,9            | +                                                                               | -4,1                                                           | +                                                                                             |
| SGR     | -4,9            | -5,9            | +                                                                               | -3,8                                                           | +                                                                                             |
| SGR     | -2,8            | -2,9            | +                                                                               | -4,8                                                           | +                                                                                             |
| SGR     | -2,8            | -5,0            | +                                                                               | -4,7                                                           | +                                                                                             |
| SGR     | -3,0            | -4,6            | +                                                                               | -5,2                                                           | +                                                                                             |
| SGR     | -2,6            | -4,1            | +                                                                               | -3                                                             | +                                                                                             |
| SGR     | -3,5            | -4,0            | +                                                                               | -4,1                                                           | +                                                                                             |
| SGR     | -3,3            | -3,5            | +                                                                               | -4,5                                                           | +                                                                                             |
| SGR     | -4,4            | -6,3            | +                                                                               | -5,1                                                           | +                                                                                             |
| SGR     | -3,8            | -3,0            | +                                                                               | -2,7                                                           | +                                                                                             |
| SGR     | -5,1            | -6,4            | +                                                                               | -4,4                                                           | +                                                                                             |
| SGR     | -2,7            | -2,9            | +                                                                               | -4,0                                                           | +                                                                                             |
| SGR     | -0,2            | -1,3            | -                                                                               | -2,8                                                           | +                                                                                             |
| SGR     | -1,2            | -1,9            | -                                                                               | -2,4                                                           | +                                                                                             |
| SGR     | -2,5            | -2,9            | +                                                                               | -3,3                                                           | +                                                                                             |
| SGR     | -1,1            | -2,0            | +                                                                               | -3                                                             | +                                                                                             |
| SGR     | -4,4            | -4,9            | +                                                                               | -2,0                                                           | +                                                                                             |
| SGR     | -1,3            | -2,3            | +                                                                               | -2,9                                                           | +                                                                                             |
| SGR     | -0,5            | -1,7            | -                                                                               | -2,6                                                           | +                                                                                             |
| SGR     | -1,1            | -3,4            | +                                                                               | -3,4                                                           | +                                                                                             |
| SGR     | -3,0            | -4,8            | +                                                                               | -4,5                                                           | +                                                                                             |
| SGR     | -0,3            | -1,6            | -                                                                               | -4,2                                                           | +                                                                                             |
| SGR     | -1,4            | -1,1            | -                                                                               | -3,1                                                           | +                                                                                             |
| SGR     | -2,2            | -2,6            | +                                                                               | -2,9                                                           | +                                                                                             |
| SGR     | -2,7            | -2,1            | +                                                                               | -4,2                                                           | +                                                                                             |
| SGR     | -0,6            | 0,6             | -                                                                               | -2,7                                                           | +                                                                                             |
| SGR     | -4,0            | -2,0            | +                                                                               | -3,6                                                           | +                                                                                             |
| SGR     | -5,7            | -6,9            | +                                                                               | -2,9                                                           | +                                                                                             |
| SGR     | -1,8            | -2,0            | +                                                                               | -3,0                                                           | +                                                                                             |
| SGR     | -3,8            | -3,7            | +                                                                               | -4,5                                                           | +                                                                                             |
| SGR     | -2,2            | -2,1            | +                                                                               | -5,4                                                           | +                                                                                             |
| SGR     | -5,1            | -6,6            | +                                                                               | -4,7                                                           | +                                                                                             |
| SGR     | -2,9            | -2,0            | +                                                                               | -4,9                                                           | +                                                                                             |
| SGR     | -1,5            | -1,4            | -                                                                               | -3,2                                                           | +                                                                                             |
| SGR     | -2,3            | -3,1            | +                                                                               | -2,8                                                           | +                                                                                             |
| SGR     | -0,1            | -1,2            | -                                                                               | -3,8                                                           | +                                                                                             |
| SGR     | -4,1            | -5,9            | +                                                                               | -5,5                                                           | +                                                                                             |
| SGR     | -2,8            | -4,9            | +                                                                               | -7,0                                                           | +                                                                                             |
